# Supplementary material
Source: publisher figshare collection journal article supplement (https://geolsoc.figshare.com/ndownloader/files/25001284)

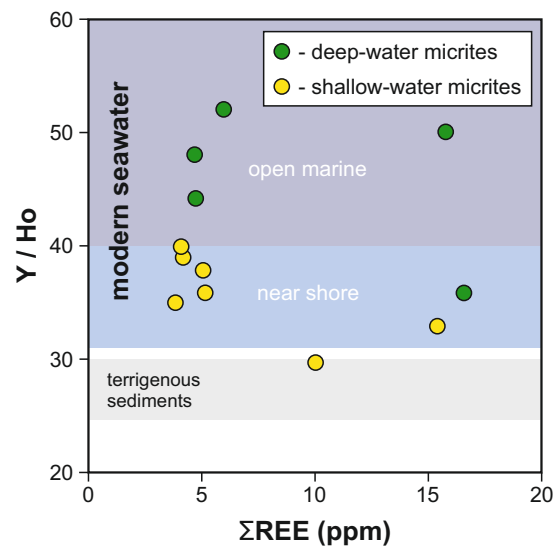

Supplement: Supplementary file 1 [file 25001284]
